# Supplementary material for: Glial-Specific Functions of Microcephaly Protein WDR62 and Interaction with the Mitotic Kinase AURKA Are Essential for Drosophila Brain Growth
Source: PubMed Central journal article supplement — Stem Cell Reports. 2017 Jun 15;9(1):32–41. doi: 10.1016/j.stemcr.2017.05.015 (PMC5511370; doi:10.1016/j.stemcr.2017.05.015), 2017-06-15
Supplement: mmc1.pdf [file mmc1.pdf]

**Stem Cell Reports, Volume 9**

**Supplemental Information**

**Glial-Specific Functions of Microcephaly Protein WDR62 and Interaction with the Mitotic Kinase AURKA Are Essential for *Drosophila* Brain Growth**

**Nicholas R. Lim, Belal Shohayeb, Olga Zaytseva, Naomi Mitchell, S. Sean Millard, Dominic C.H. Ng, and Leonie M. Quinn**

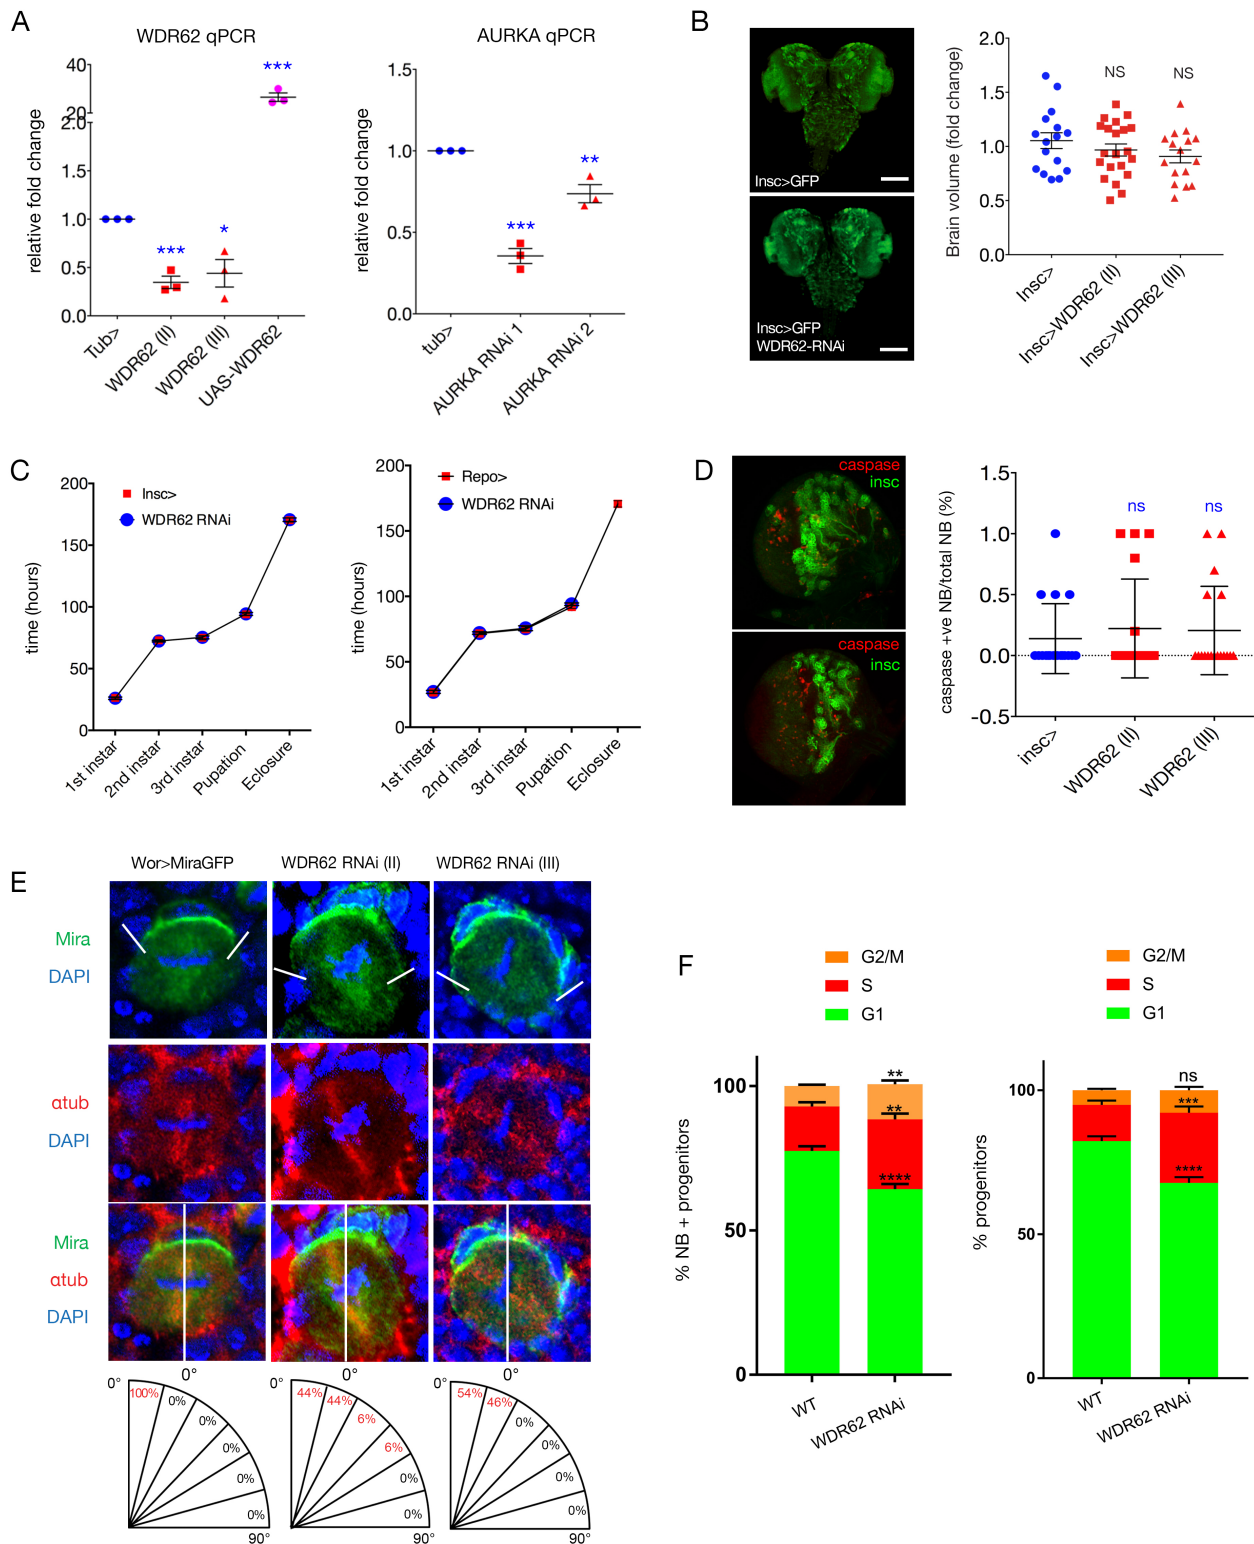

**Supplemental Figure 1 A - Verification of *wdr62* and *aurka* RNAi knockdown - qPCR** following *WDR62* depletion using *Tubulin-GAL4* to drive either of two alternate *UAS-WDR62* RNAi lines to non-overlapping regions of *wdr62*. *Tubulin-GAL4* driven *AURKA* depletion with either of two independent *UAS-AURKA* RNAi lines. **B - *WDR62* depletion in the neuroblast lineage does not alter brain size.** Volume analysis of *Insc-GAL4-GFP/+* and *Insc-GAL4-GFP/UAS-WDR62* RNAi third instar (96 hr) larval brains. **C - Developmental timing was not altered by depletion of *WDR62*.** *wdr62* knockdown driven in neuroblasts (*Insc>*) or glia (*Repo>*)

compared with control. **D - WDR62 depletion does not result in increased neuroblast death.** Representative brain lobe and quantification of caspase positive cells as a % of all NBs per brain lobe. **E - WDR62 knockdown is associated with mitotic spindle defects.** Mitotic spindles ( $\alpha$ -Tubulin) and chromosomes (DAPI) relative to the basal crescent marker Miranda (Mira) for the control (*Wor-GAL4-miraGFP* /+) or following WDR62 knockdown (*WDR62* RNAi (II) or (III)). White lines mark the extent of each Mira crescent. The pie charts show distribution of spindle orientation. **F - WDR62 is required for neuroblast proliferation.** *Insc-GAL4*-driven *FUCCI* for control or the *WDR62* (III) RNAi. Cell cycle profiles for total Insc-G4 population (neuroblasts and progenitors) and progenitors in G1, S or G2M.

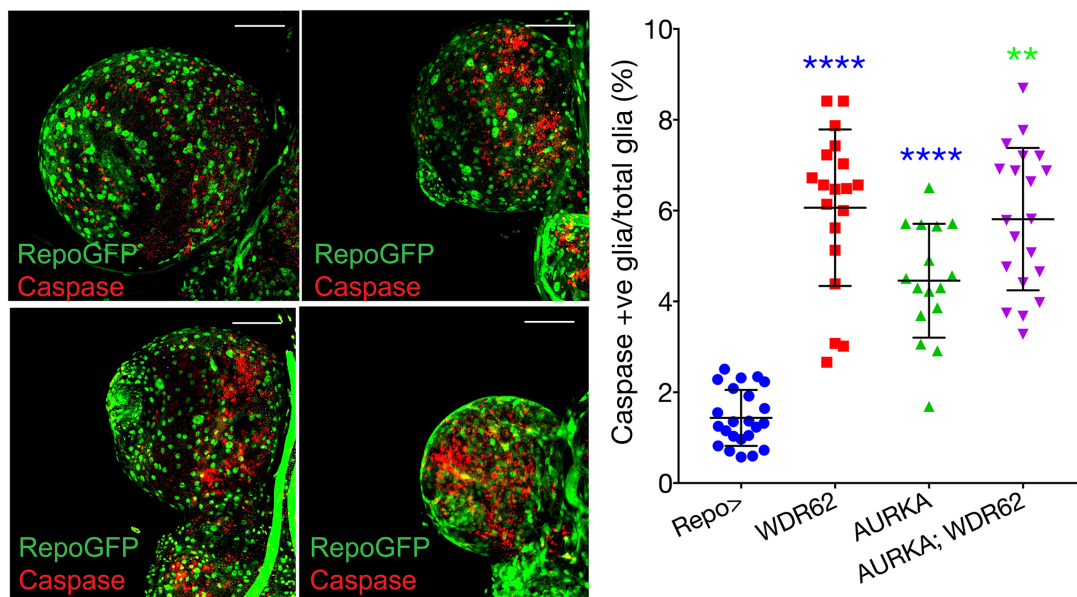

**Supplemental Figure 2** – Cell death analysis of glia following *wdr62* and/or *aurka* knockdown in with *repo-GAL4* lineage (genotypes and antibody staining as marked) (#brains: *Repo-GAL4*=23, *siWDR62*=19, *siWDR62;siAURKA*=21).

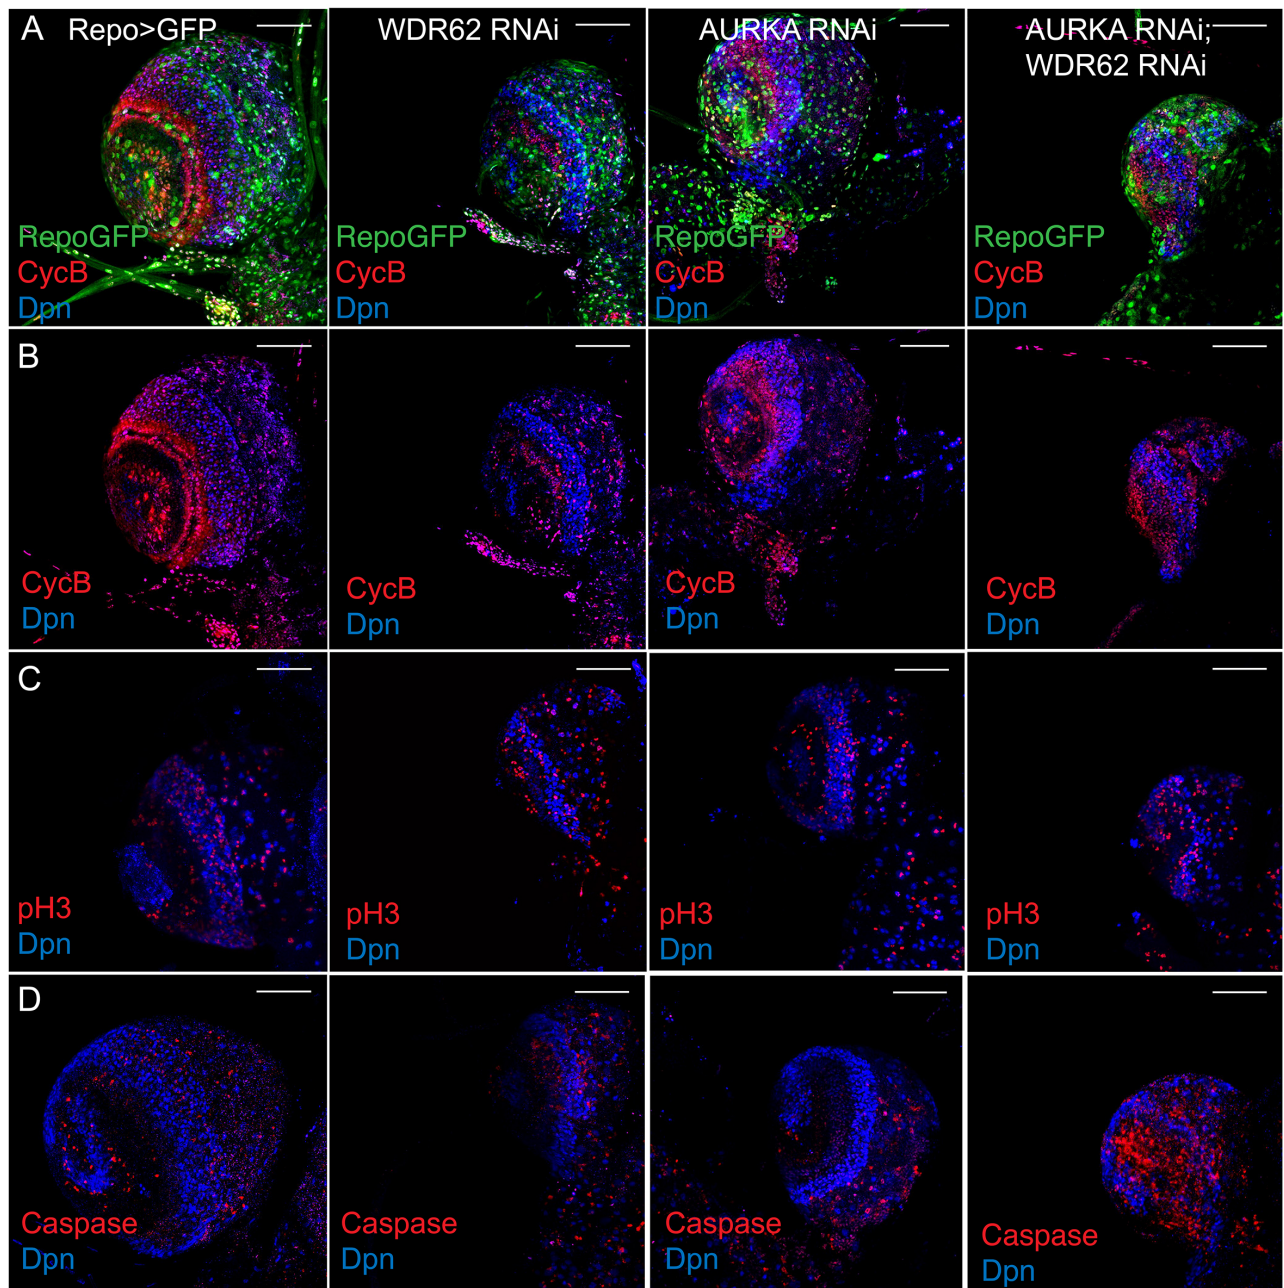

**Supplemental Figure 3** – Cell cycle and cell death analysis of neuroblasts following *wdr62* and/or *aurka* knockdown in the glial lineage (genotypes and antibody staining as marked). For quantification see Figure 3.

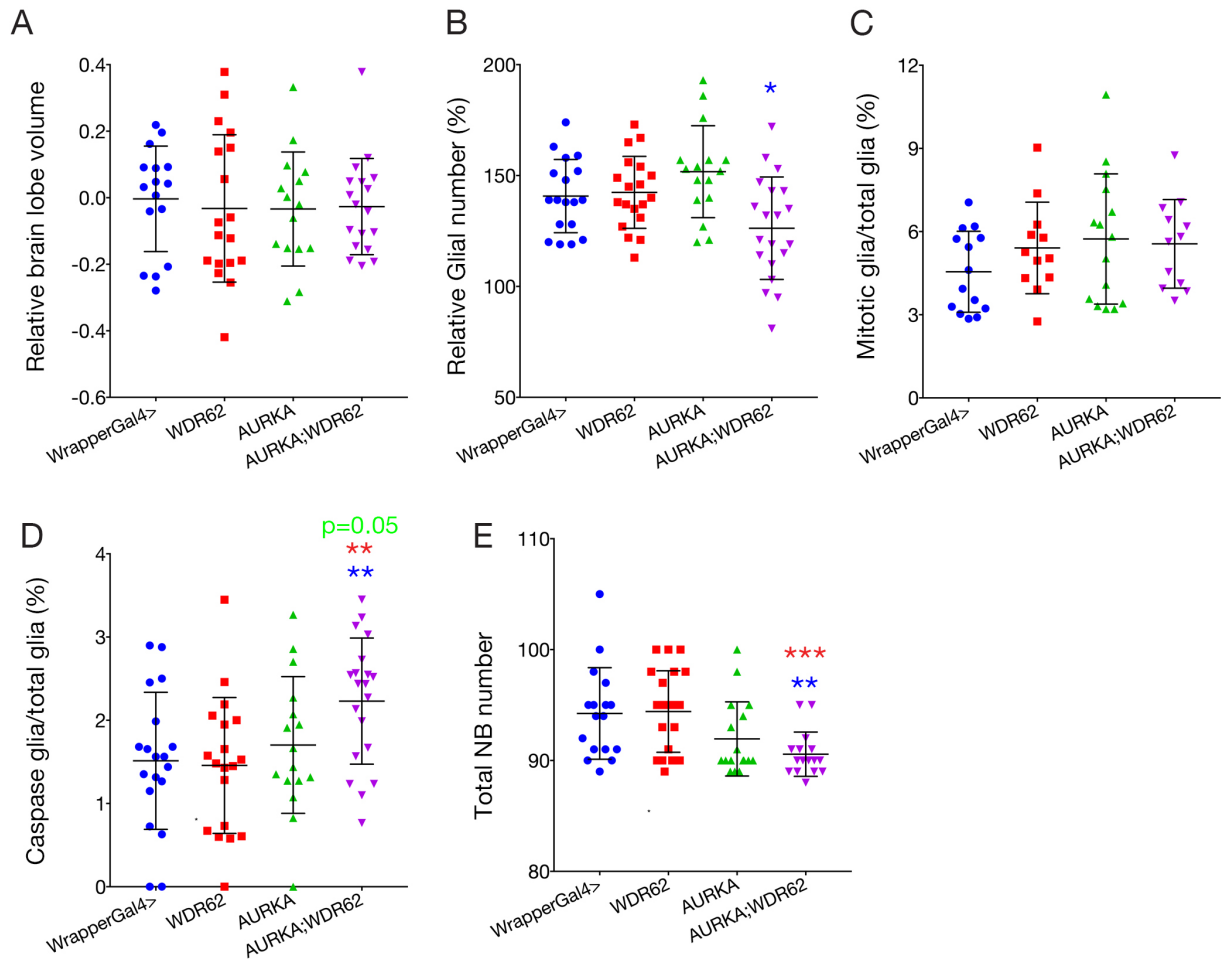

**Supplemental Figure 4** – Cell cycle and cell death analysis of following *wdr62* and/or *aurka* knockdown in the cortical glial lineage using *Wrapper-GAL4* (genotypes as marked). (#brains: *Wrapper-GAL4*=18, si*WDR62*=18, si*WDR62*;si*AURKA*=19).
